# Supplementary material
Source: publisher figshare collection journal article supplement (https://acs.figshare.com/ndownloader/files/5093569)

# Cyclohexenones as Michael Acceptors in the Staunton-Weinreb Annulation: A Simple Stannane Modification for the Synthesis of Polycyclic Systems

Bryan Hill<sup>†</sup> and Russell Rodrigo<sup>\*</sup>

Department of Chemistry, University of Waterloo, 200 University Avenue West,  
Waterloo, Ontario, Canada N2L 3G1  
rrodrigo@uwaterloo.ca

## Supporting Information

**General Information:** Tetrahydrofuran (THF) was dried and distilled over Na/benzophenone and diisopropylamine was dried and distilled over CaH<sub>2</sub>. All other reagents were purchased and used as obtained from commercial sources. All glassware was dried in an oven and stored in a dry box prior to use. All NMR spectra were recorded in CDCl<sub>3</sub> on a Bruker 300 Avance spectrometer and reported at  $\delta$  7.24 and  $\delta$  77.0 for the <sup>1</sup>H and <sup>13</sup>C respectively.

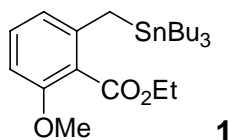

**Stannane 1:** To a solution of *i*-Pr<sub>2</sub>NH (3.24 mL, 23.2 mmole) and THF (90 mL) at 0°C was added *n*-BuLi (2.0 M, 10.8 mL, 21.6 mmole). After 15 mins the solution was cooled to -78°C and a solution of ethyl-2-methoxy-6-methyl benzoate<sup>1</sup> (3.00 g, 15.45 mmole) and THF (30 mL) was added *via* cannula. The resulting red solution was stirred for 2 hrs at -78°C before Bu<sub>3</sub>SnCl (5.44 mL, 20.1 mmole) was added *via* a syringe. The resulting yellow solution was warmed to room temperature and quenched with aq NH<sub>4</sub>Cl. The product was extracted with Et<sub>2</sub>O (x3), washed with brine, dried over MgSO<sub>4</sub>, filtered and concentrated. Purification by flash chromatography (25:1 Hexanes:EtOAc) yielded 4.57 g, (61%) of stannane as a clear colourless liquid. <sup>1</sup>H NMR (300 MHz)  $\delta$  7.10 (1H, t, *J* = 8.0 Hz), 6.58 (1H, d, *J* = 7.8 Hz), 6.51 (1H, d, *J* = 8.3 Hz), 4.34 (2H, q, *J* = 7.1 Hz), 3.76 (3H, s), 2.22 (2H, s), 1.43-1.16 (15H, m), 0.92-0.72 (15H, m); <sup>13</sup>C NMR (75 MHz)  $\delta$  168.5, 156.6, 142.9, 129.8, 121.2, 120.5, 120.4, 105.5, 60.7, 55.6, 28.8 (t, *J* = 10 Hz), 27.2 (t, *J* = 27.6 and 34.6 Hz), 17.4, 16.2, 13.6, 9.8 (t, *J* = 153.6 and 160.3 Hz); LR-EIMS *m/z*: 427 (M<sup>+</sup>-C<sub>4</sub>H<sub>9</sub>, 100), 425 (M<sup>+</sup>-C<sub>4</sub>H<sub>9</sub>, 75); LR-CIMS (NH<sub>3</sub>): 485 (MH<sup>+</sup>, 100); HR-EIMS calculated for C<sub>19</sub>H<sub>31</sub><sup>116</sup>SnO<sub>3</sub> (M<sup>+</sup>-C<sub>4</sub>H<sub>9</sub>): 423.1285 found 423.1284

**General Ring Annulation Protocol:** To a cooled ( $-78^{\circ}\text{C}$ ) solution of stannane (1.4 eq) in THF was added *n*-BuLi (1.4 eq) resulting in a deep red colour. The mixture was stirred for 30 mins before a solution of enone (1.0 eq) and THF was added *via* cannula. The solution was stirred at  $-78^{\circ}\text{C}$  for 1 hr before being warmed to room temperature and stirred for a further 3 hrs (the red colour disappears resulting in a yellow solution). The reaction was quenched with aq.  $\text{NH}_4\text{Cl}$ , extracted with  $\text{Et}_2\text{O}$  (x3), washed with brine, dried over  $\text{MgSO}_4$ , filtered and concentrated. Purification by flash chromatography (8:1 Hexanes: EtOAc) yielded pure products.

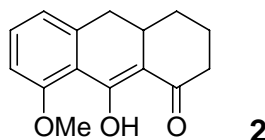

**Compound 2:** Stannane (500 mg, 1.03 mmole) in THF (8 mL), *n*-BuLi (2.0 M, 520  $\mu\text{L}$ , 1.03 mmole), cyclohex-1-en-one (71  $\mu\text{L}$ , 0.739 mmole) in THF (2 mL) yielded 135.4 mg (75%) of product as a pale yellow solid.  $^1\text{H}$  NMR (300 MHz)  $\delta$  7.30 (1H, t,  $J = 8.0$  Hz), 6.82 (1H, d,  $J = 8.5$  Hz), 6.73 (1H, d,  $J = 7.6$  Hz), 3.87 (3H, s), 2.69 (1H, dd,  $J = 13.2, 3.0$  Hz), 2.62-2.53 (1H, m), 2.59 (1H, d,  $J = 13.2$  Hz), 2.42-2.36 (2H, m), 1.99-1.83 (2H, m), 1.62-1.52 (1H, m), 1.32-1.19 (1H, m);  $^{13}\text{C}$  NMR (75 MHz)  $\delta$  186.9, 182.7, 159.9, 144.6, 133.3, 120.6, 120.0, 110.4, 109.3, 55.9, 37.5, 32.9, 31.2, 29.9, 20.7; LR-EIMS  $m/z$ : 244 ( $\text{M}^+$ , 100), 216 (37), 188 (42); HR-EIMS: calculated for  $\text{C}_{15}\text{H}_{16}\text{O}_3$ : 244.1099 found 244.1099.

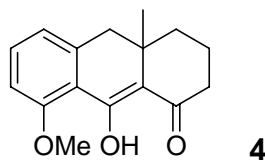

**Compound 4:** Stannane (500 mg, 1.03 mmole) in THF (8 mL), *n*-BuLi (2.0 M, 520  $\mu\text{L}$ , 1.03 mmole), 3-methyl-cyclohex-1-en-one (83  $\mu\text{L}$ , 0.735 mmole) in THF (2 mL) yielded 140 mg (74%) of product as a pale yellow solid.  $^1\text{H}$  NMR (300 MHz)  $\delta$  7.32 (1H, t,  $J = 8.0$  Hz), 6.84 (1H, d,  $J = 8.5$  Hz), 6.73 (1H, d,  $J = 7.4$  Hz), 3.89 (3H, s), 2.80 (1H, d,  $J = 15.0$  Hz), 2.55 (1H, d,  $J = 15.0$  Hz), 2.43-2.38 (2H, m), 1.86-1.66 (3H, m), 1.51 (1H, dt,  $J = 13.0, 3.8$  Hz), 0.95 (3H, s);  $^{13}\text{C}$  NMR (75 MHz)  $\delta$  186.3, 182.8, 159.9, 143.4, 133.5, 120.8, 119.9, 112.8, 110.4, 55.8, 45.1, 37.2, 32.8, 31.0, 24.7, 17.2; LR-EIMS  $m/z$ : 258 ( $\text{M}^+$ , 20), 243 ( $\text{M}^+ - \text{CH}_3$ , 100); HR-EIMS: calculated for  $\text{C}_{16}\text{H}_{18}\text{O}_3$ : 258.1256 found 258.1252.

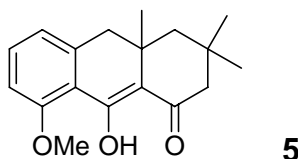

**Compound 5:** Stannane (500 mg, 1.03 mmole) in THF (8 mL), *n*-BuLi (2.0 M, 520  $\mu$ L, 1.03 mmole), isophorone (110  $\mu$ L, 0.735 mmole) in THF (2 mL) yielded 175.3 mg (83%) of product as a white solid.  $^1\text{H}$  NMR (300 MHz)  $\delta$  7.27 (1H, t,  $J$  = 8.0 Hz), 6.79 (1H, d,  $J$  = 8.4 Hz), 6.68 (1H, d,  $J$  = 7.4 Hz), 3.85 (3H, s), 2.86 (1H, d,  $J$  = 15.2 Hz), 2.47 (1H, d,  $J$  = 15.2 Hz), 2.17 (2H, d,  $J$  = 2.17 Hz), 1.50 (2H, ABq,  $J$  = 4.0 Hz), 1.02 (3H, s), 0.98 (3H, s), 0.97 (3H, s);  $^{13}\text{C}$  NMR (75 MHz)  $\delta$  185.1, 183.4, 159.9, 143.5, 133.4, 121.0, 120.1, 111.1, 110.3, 55.8, 50.5, 46.4, 45.7, 33.1, 30.8, 30.5, 30.0, 27.2; LR-EIMS  $m/z$ : 286 ( $\text{M}^+$ , 15), 271 (100); HR-EIMS: calculated for  $\text{C}_{18}\text{H}_{22}\text{O}_3$ : 286.1569 found 286.1569.

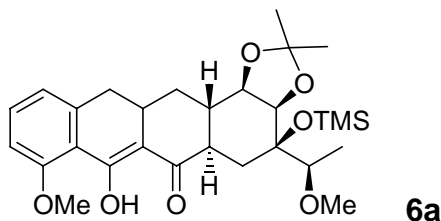

**Compound 6a:** Stannane (244 mg, 0.505 mmole) in THF (5 mL), *n*-BuLi (2.0 M, 252  $\mu$ L, 0.505 mmole), enone (133 mg, 0.361 mmole) in THF (5 mL) yielded 132.9 mg (71%) of tetracycle as an amorphous solid.  $^1\text{H}$  NMR (300 MHz)  $\delta$  7.34 (1H, t,  $J$  = 8.0 Hz), 6.86 (1H, d,  $J$  = 8.4 Hz), 6.78 (1H, d,  $J$  = 7.4 Hz), 3.95-3.91 (2H, m), 3.91 (3H, s), 3.28 (3H, s), 3.28-3.24 (1H, m), 2.78-2.47 (5H, m), 2.27-2.22 (1H, m), 1.59-1.53 (2H, m), 1.47 (3H, s), 1.39 (3H, s), 1.27 (3H, d,  $J$  = 6.2 Hz), 1.04 (1H, q,  $J$  = 11.1 Hz), 0.12 (9H, s);  $^{13}\text{C}$  NMR (75 MHz)  $\delta$  186.1, 185.4, 159.8, 144.5, 133.2, 120.6, 120.0, 110.5, 108.4, 107.5, 107.3, 85.3, 80.5, 80.4, 77.8, 57.2, 56.0, 40.3, 38.9, 37.6, 33.3, 32.3, 30.6, 28.7, 26.3, 12.5, 2.7; LR-EIMS  $m/z$ : 516 ( $\text{M}^+$ , 75), 399 ( $\text{M}^+ - \text{C}_6\text{H}_{13}\text{O}_2$ , 100), 457 ( $\text{M}^+ - \text{C}_3\text{H}_7\text{O}$ , 90); HR-EIMS calculated for  $\text{C}_{28}\text{H}_{40}\text{O}_7\text{Si}$ : 516.2543 found 516.2555.

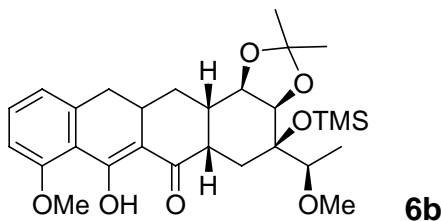

**Compound 6b:** Stannane (354 mg, 0.732 mmole) in THF (7.5 mL), *n*-BuLi (2.0 M, 370  $\mu$ L, 0.732 mmole), enone (192.7 mg, 0.523 mmole) in THF (7.5 mL) yielded 167.7 mg (62%) of tetracycle as an amorphous solid.  $^1\text{H}$  NMR (300 MHz)  $\delta$  7.31 (1H, t,  $J$  = 8.0 Hz), 6.83 (1H, d,  $J$  = 8.4 Hz), 6.73 (1H, d,  $J$  = 7.4 Hz), 4.03 (1H, d,  $J$  = 7.1 Hz), 3.98-3.90 (1H, m), 3.88 (3H, s), 3.24-3.17 (1H, m), 3.22 (3H, s), 2.85-2.66 (3H, m), 2.52 (1H, d,  $J$  = 14.1 Hz), 2.45-2.29 (2H, m), 2.16-2.12 (1H, m), 1.49 (3H, s), 1.45-1.35 (2H, m), 1.29 (3H, s), 1.17 (3H, d,  $J$  = 6.2 Hz), 0.12 (9H, s);  $^{13}\text{C}$  NMR (75 MHz)  $\delta$  186.3, 185.9, 159.8, 144.5, 133.3, 120.8, 120.0, 110.5, 108.5, 108.3, 81.0, 77.7, 75.7, 74.5, 56.2, 56.0, 37.5, 36.5, 33.0, 29.6, 29.5, 28.0, 27.4, 25.2, 12.3, 2.7; LR-EIMS  $m/z$ : 516 ( $\text{M}^+$ , 10), 457 ( $\text{M}^+ - \text{C}_3\text{H}_7\text{O}$ , 100), 399 ( $\text{M}^+ - \text{C}_6\text{H}_{13}\text{O}_2$ , 35); HR-EIMS: calculated for  $\text{C}_{28}\text{H}_{40}\text{O}_7\text{Si}$ : 516.2543 found 516.2531.

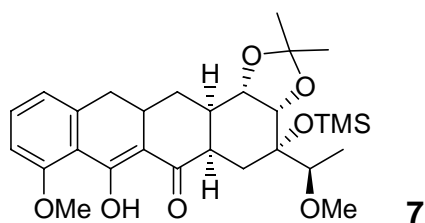

**Compound 7:** Stannane (228 mg, 0.472 mmole) in THF (5 mL), *n*-BuLi (2.0 M, 240  $\mu$ L, 0.472 mmole), enone (124.3 mg, 0.337 mmole) in THF (5 mL) yielded 89.6 mg (51%) of tetracycle as an amorphous solid.  $^1\text{H}$  NMR (300 MHz)  $\delta$  7.31 (1H, t,  $J$  = 8.0 Hz), 6.83 (1H, d,  $J$  = 8.4 Hz), 6.73 (1H, d,  $J$  = 7.4 Hz), 4.04-3.92 (2H, m), 3.88 (3H, s), 3.26-3.22 (1H, m), 3.24 (3H, s), 2.85-2.66 (3H, m), 2.55-2.46 (2H, m), 2.23-2.13 (2H, m), 1.65 (1H, dd,  $J$  = 14.9, 8.9 Hz), 1.45-1.40 (1H, m), 1.44 (3H, s), 1.27 (3H, s), 1.15 (3H, d,  $J$  = 6.2 Hz), 0.13 (9H, s);  $^{13}\text{C}$  NMR (75 MHz)  $\delta$  187.1, 184.8, 159.8, 144.7, 135.5, 120.8, 120.0, 110.4, 108.6, 108.5, 81.4, 77.9, 74.5, 74.4, 56.3, 56.0, 37.5, 36.3, 33.2, 31.2, 29.7, 28.0, 27.6, 25.6, 13.7, 2.4; LR-EIMS  $m/z$ : 516 ( $\text{M}^+$ , 5), 457 (100), 399 (25), 367 (20); HR-EIMS: calculated for  $\text{C}_{28}\text{H}_{40}\text{O}_7\text{Si}$  516.2543 found 516.2548.

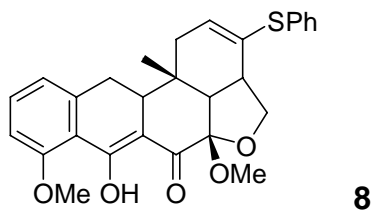

**Compound 8:** Stannane (62 mg, 0.128 mmole), in THF (5 mL), *n*-BuLi (2.0 M, 65  $\mu$ L, 0.128 mmole), enone (30.1 mg, 0.0916 mmole) in THF (1 mL) yielded 20.6 mg (47%) of pentacycle as a film.  $^1\text{H}$  NMR (300 MHz)  $\delta$  7.40-7.22 (6H, m), 6.87 (1H, d,  $J$  = 8.5 Hz), 6.77 (1H, d,  $J$  = 8.5 Hz), 6.05 (1H, d,  $J$  = 6.7 Hz), 4.04 (1H, t,  $J$  = 8.5 Hz), 3.92 (3H, s), 3.42 (3H, s), 3.31-3.28 (2H, m), 2.94-2.88 (2H, m), 2.64-2.53 (2H, m), 2.42 (1H, dd,  $J$  = 17.5, 6.9 Hz), 2.12-2.02 (1H, m), 1.09 (3H, s); LR-EIMS  $m/z$ : 476 ( $\text{M}^+$ , 42), 444 (100), 416 (65), 367 (33), 307 (70), 201 (32); HR-EIMS calculated for  $\text{C}_{28}\text{H}_{28}\text{O}_5\text{S}$  476.1657 found 476.1656.

<sup>1</sup> Hauser, F.M.; Pogany, S.A. *Synthesis*, **1980**, 814 and Hamada, Y.; Hara, O.; Kawai, A.; Kohno, Y.; Shioiri, T. *Tetrahedron*, **1991**, 47, 8635

Stannane 1, 300 MHz  $^1\text{H}$  NMR ( $\text{CDCl}_3$ )

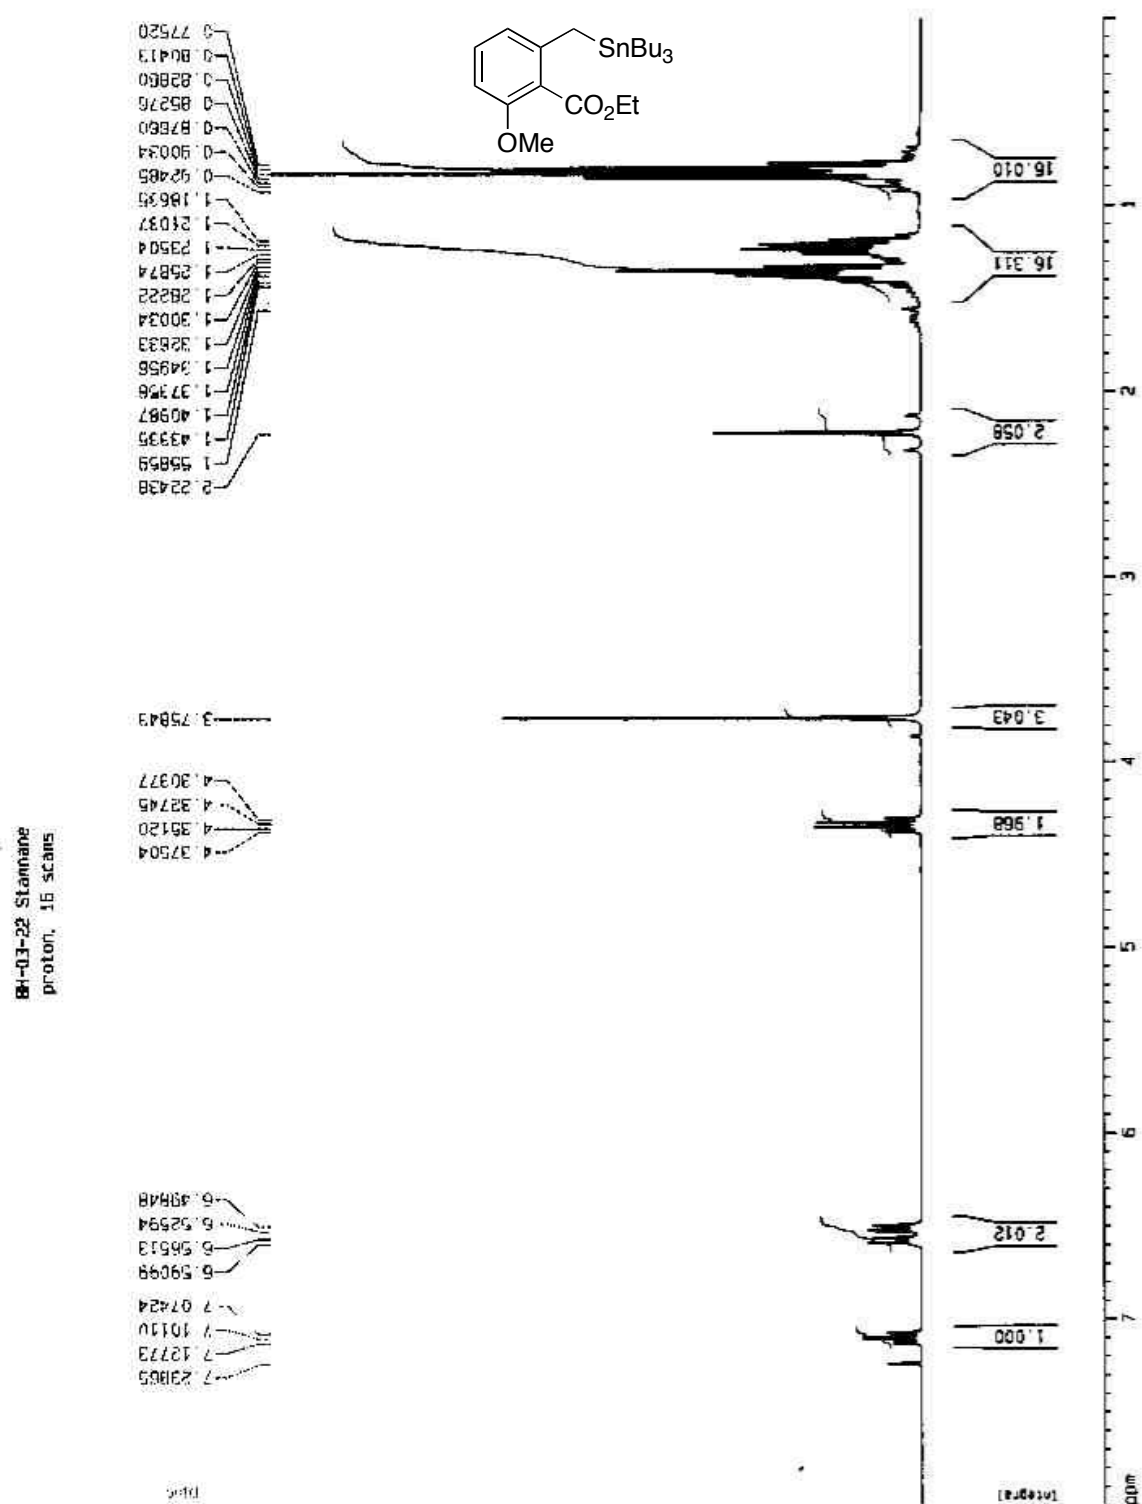

Stannane 1, 75 MHz  $^{13}\text{C}$  NMR ( $\text{CDCl}_3$ )

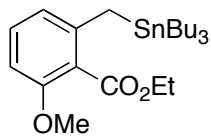

01-03-22 Stannane  
 $^{13}\text{C}$  observe with  $^1\text{H}$  decoupling

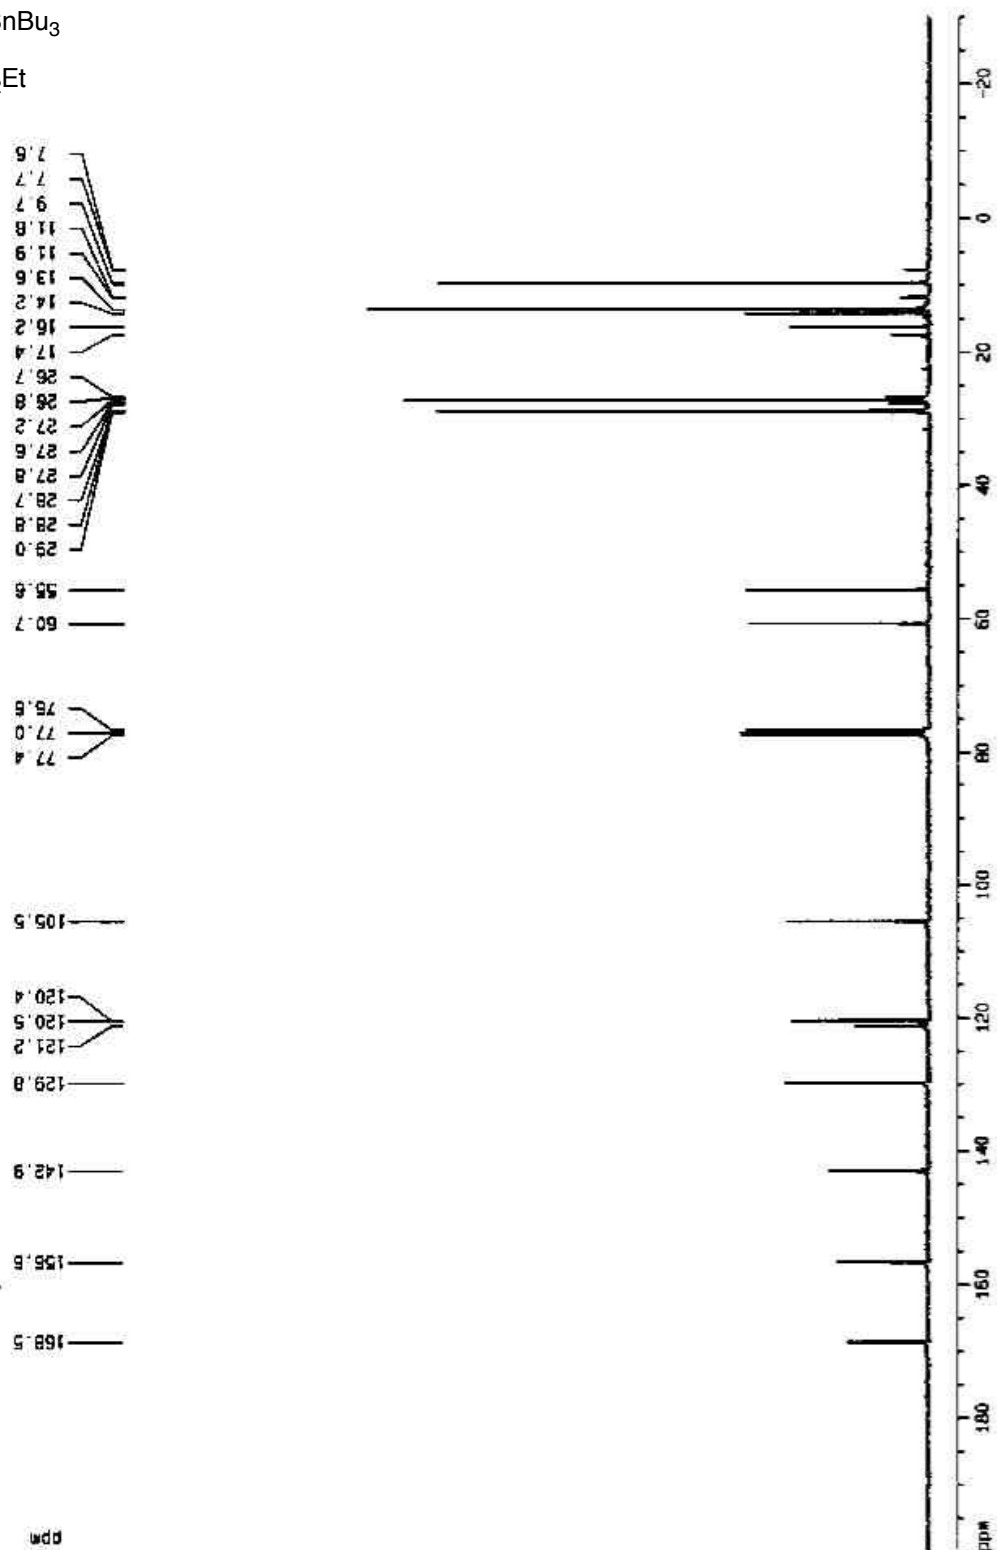

Compound 2, 300 MHz  $^1\text{H}$  NMR ( $\text{CDCl}_3$ )

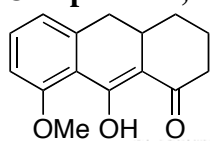

Specs 91, 18 scans  
PC-EO-H8

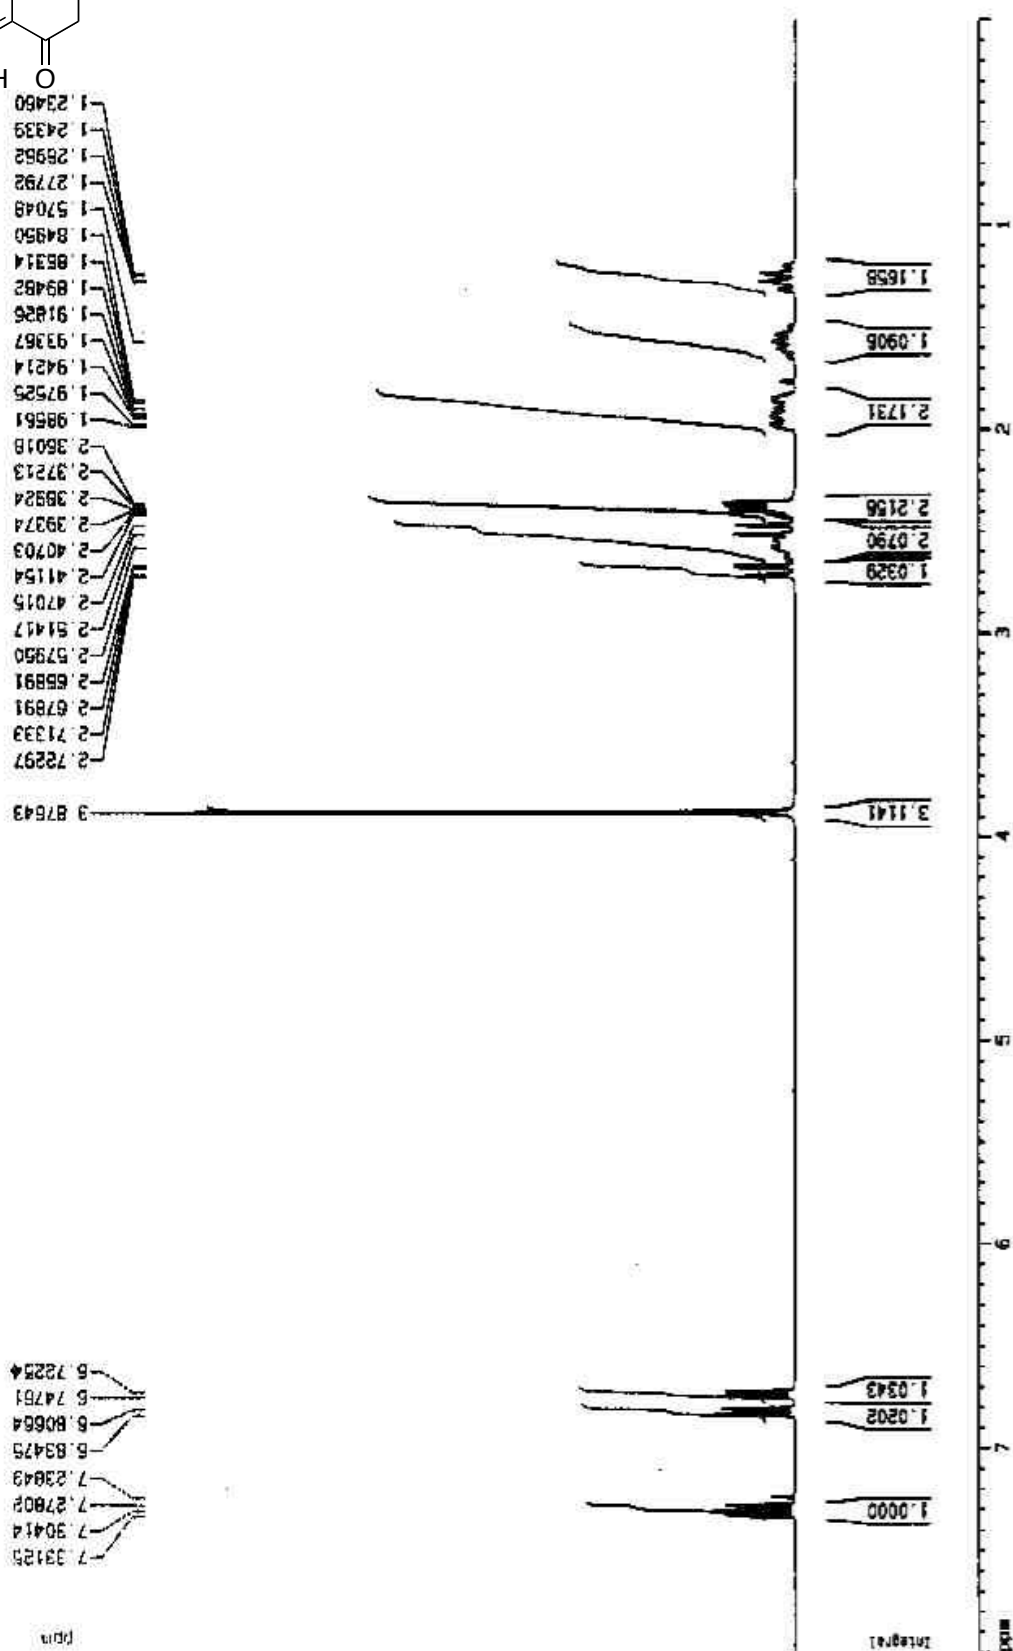

Compound 2, 75 MHz  $^{13}\text{C}$  NMR ( $\text{CDCl}_3$ )

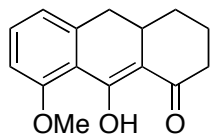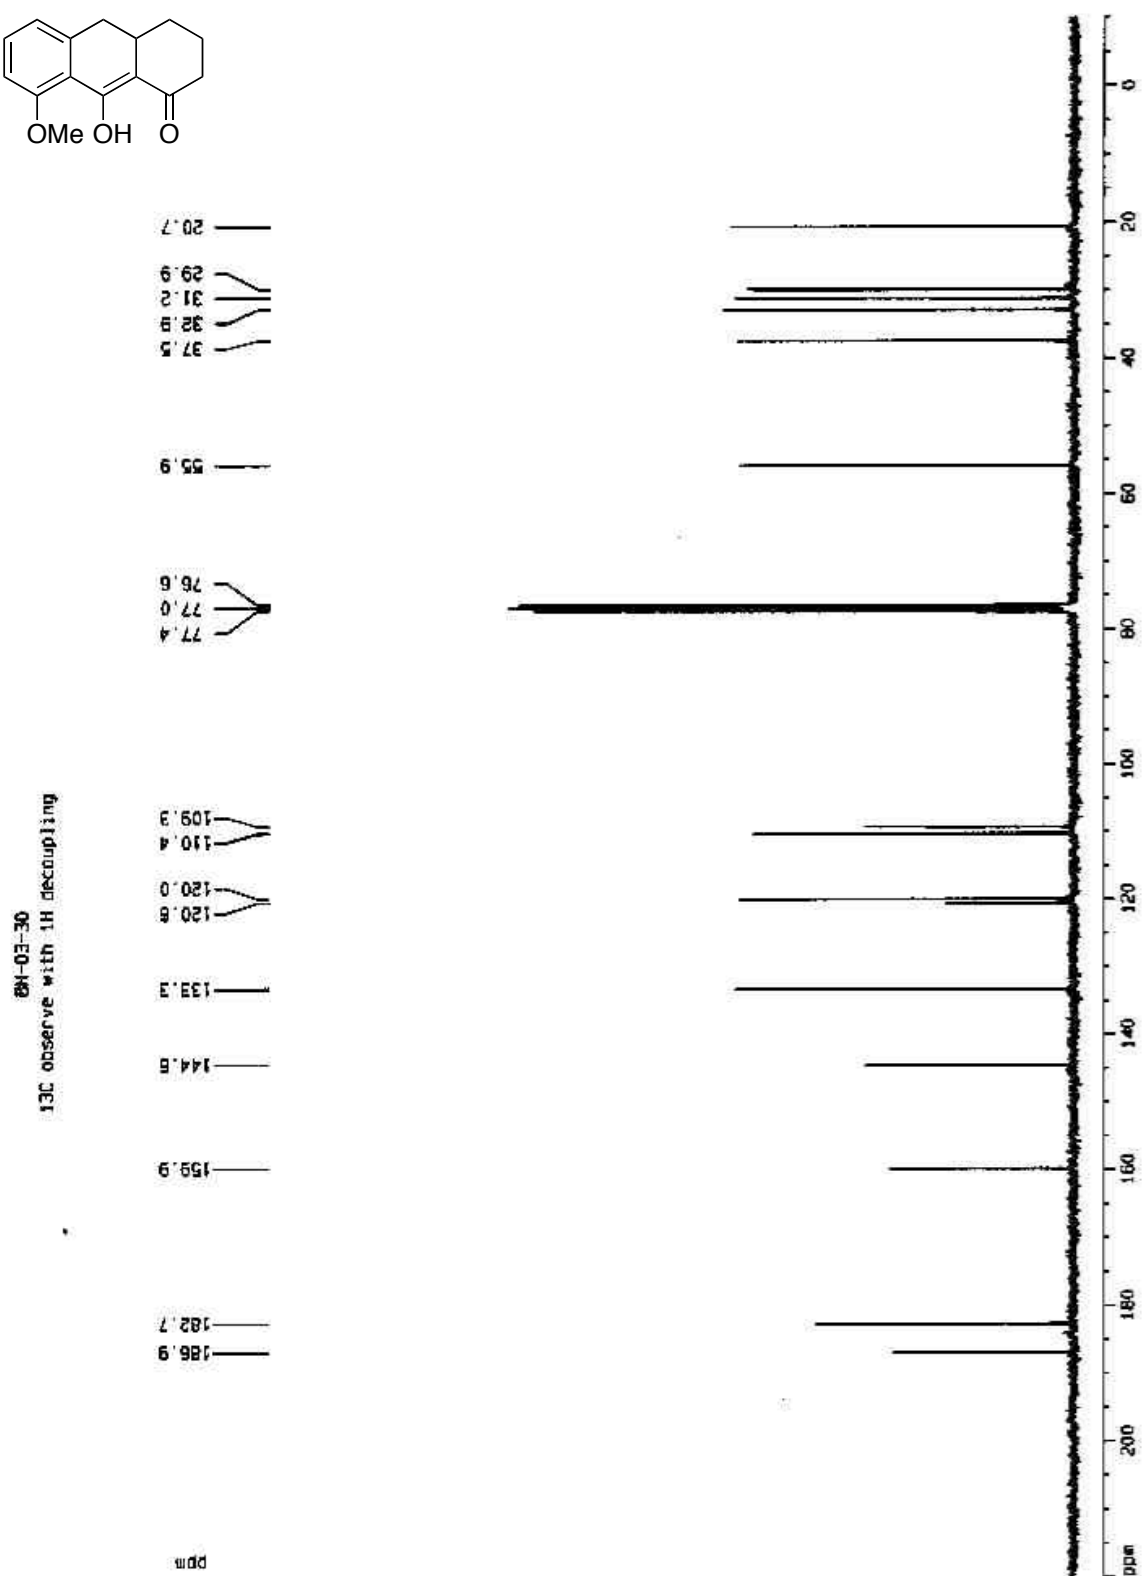



Compound 4, 300 MHz  $^1\text{H}$  NMR ( $\text{CDCl}_3$ )

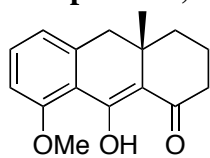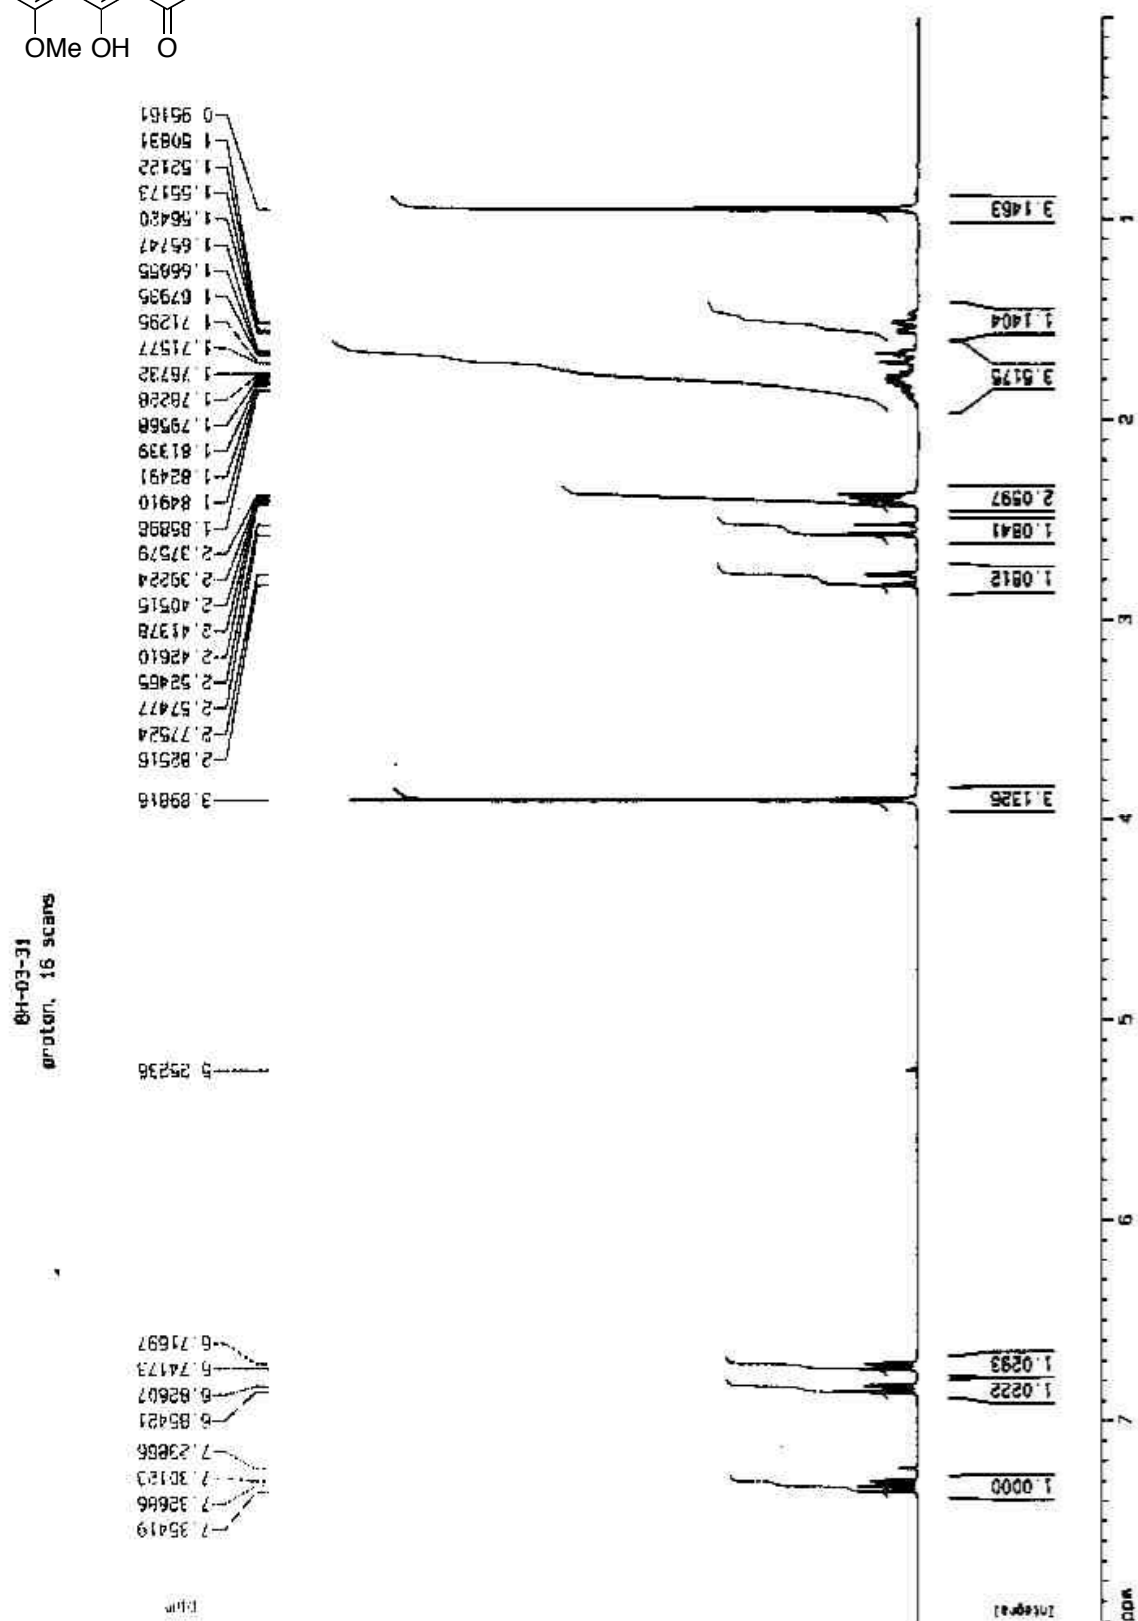

Compound 4, 75 MHz  $^{13}\text{C}$  NMR ( $\text{CDCl}_3$ )

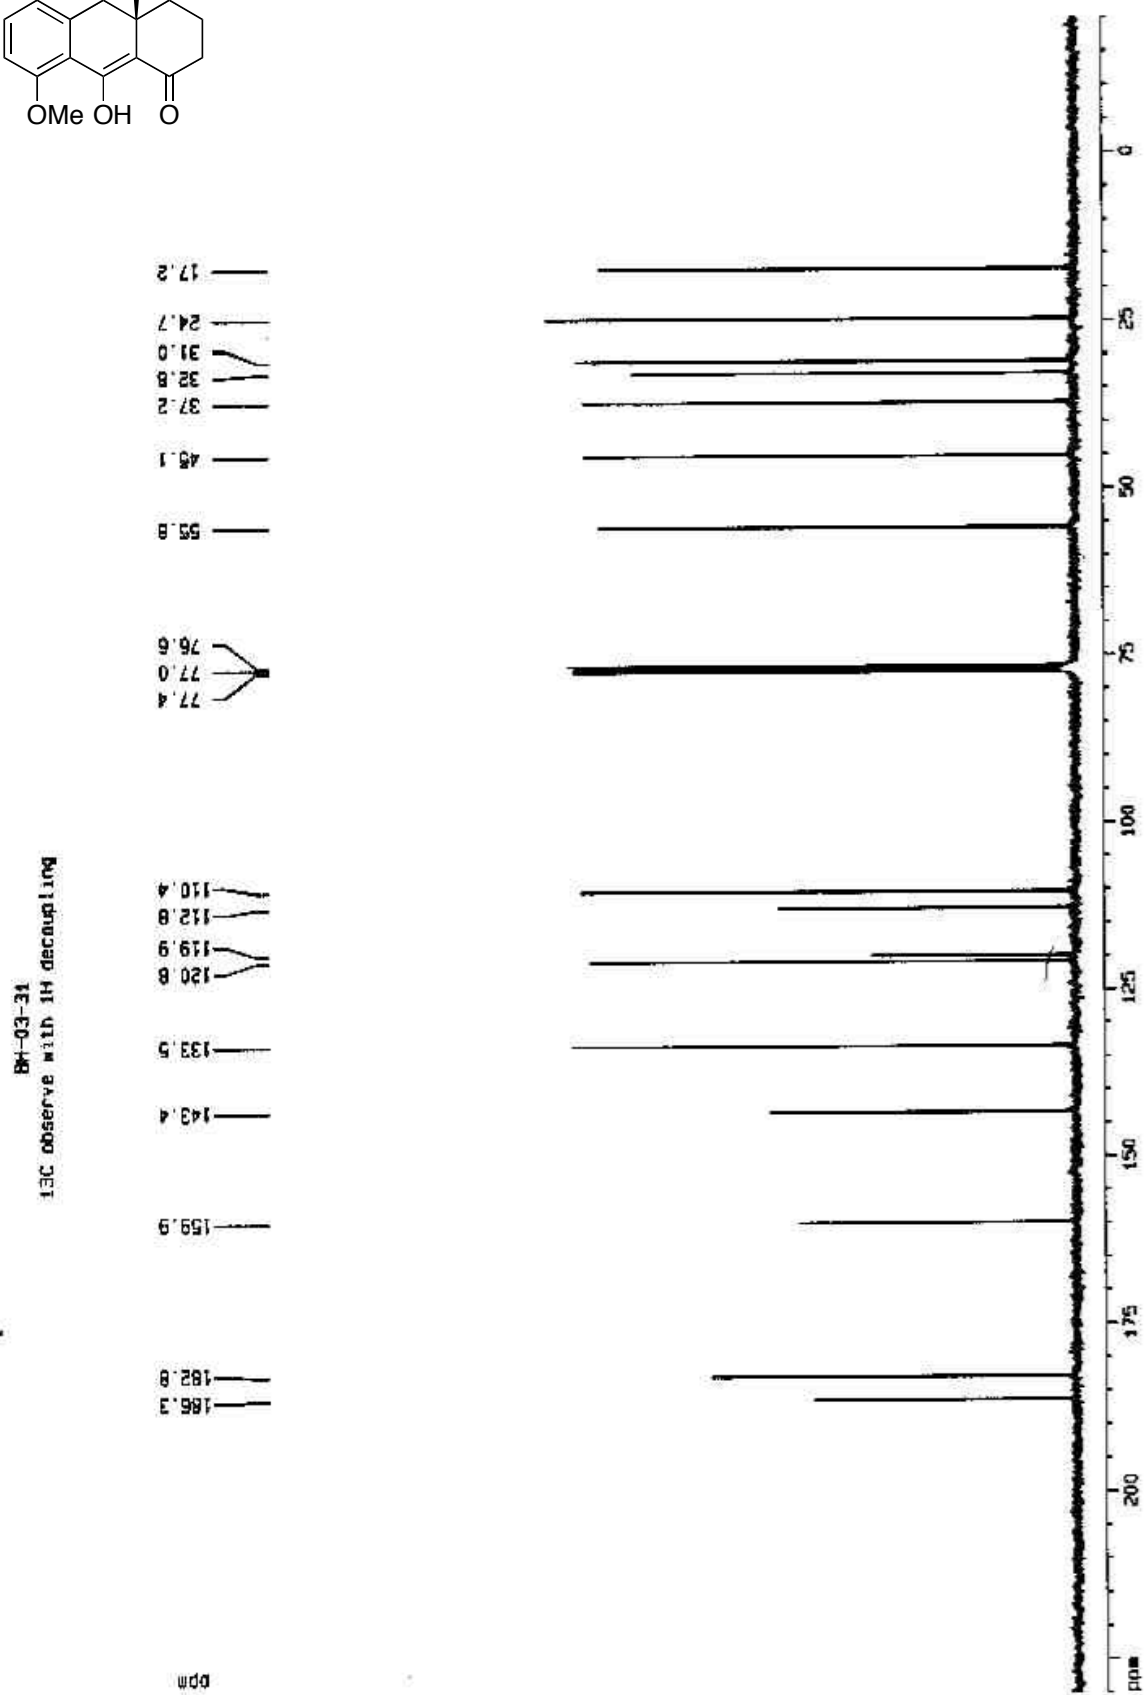

**Compound 5, 300 MHz  $^1\text{H}$  NMR ( $\text{CDCl}_3$ )**

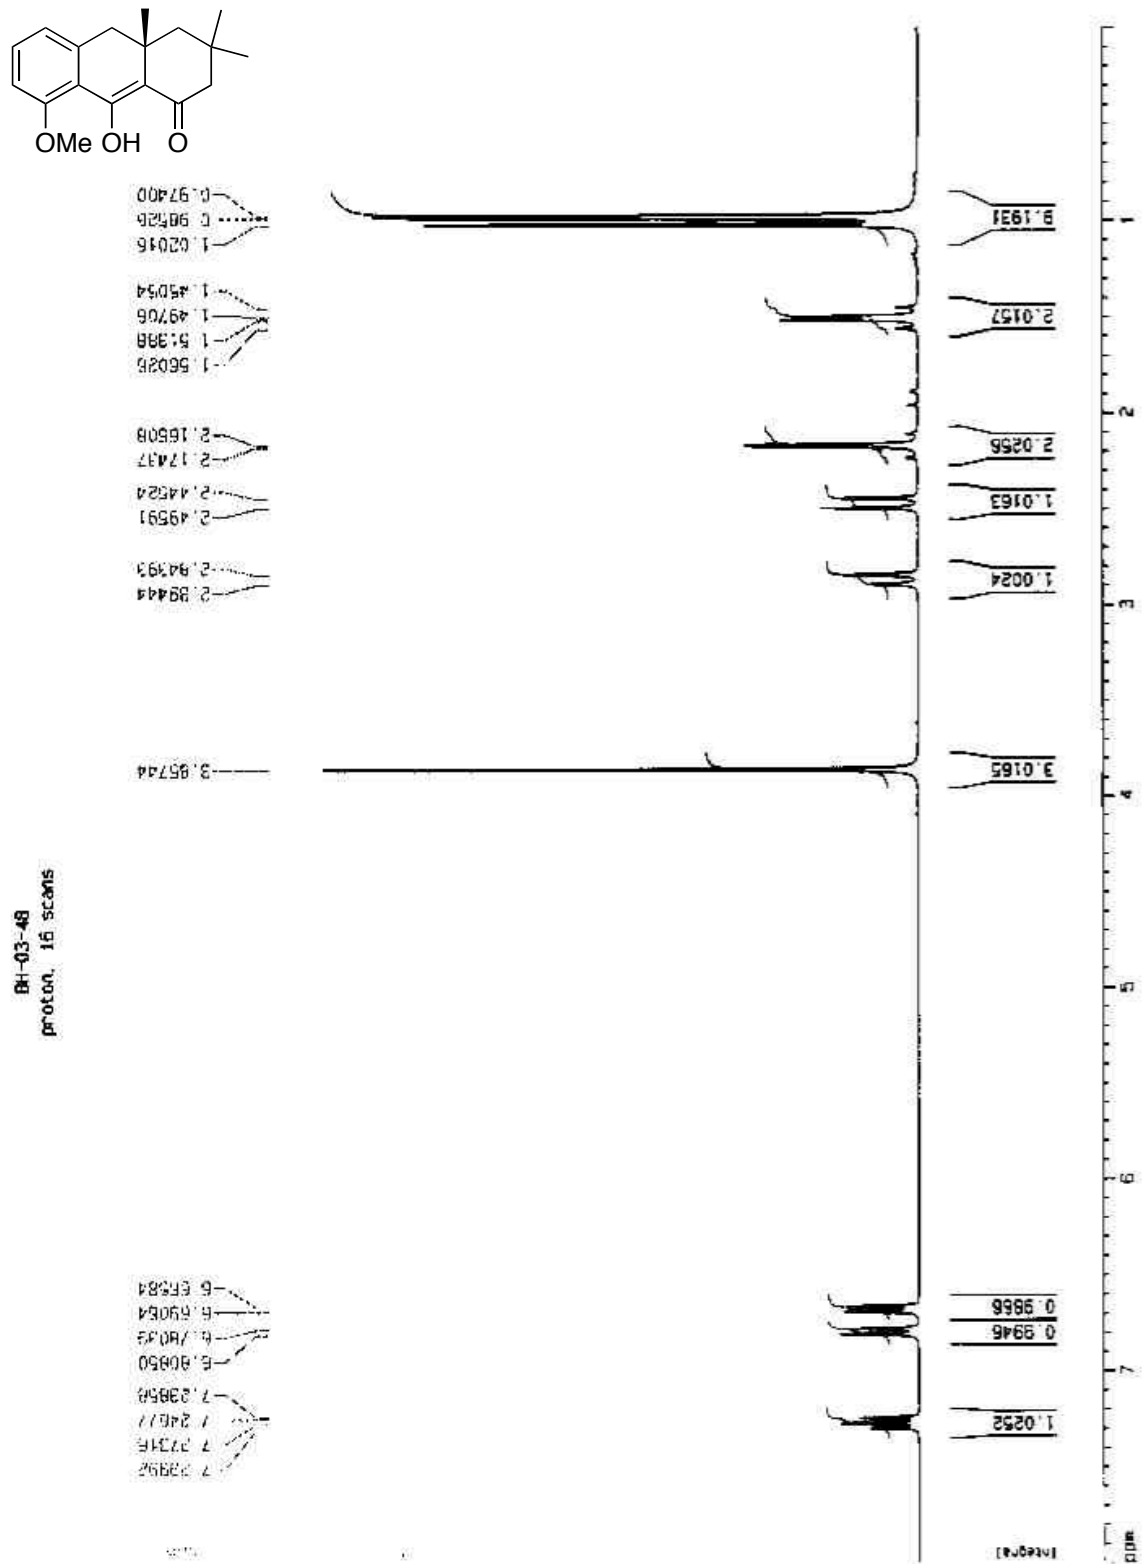

Compound 5, 75 MHz  $^{13}\text{C}$  NMR ( $\text{CDCl}_3$ )

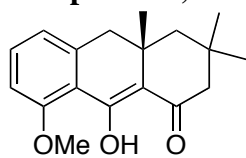

84-03-48  
 $^{13}\text{C}$  observe with  $^1\text{H}$  decoupling

27.2  
30.0  
30.5  
30.8  
33.1  
45.7  
46.4  
50.5  
55.8

76.6  
77.0  
77.4

110.3  
111.1  
120.1  
121.0

133.4

143.5

159.9

183.4  
185.1

ppm

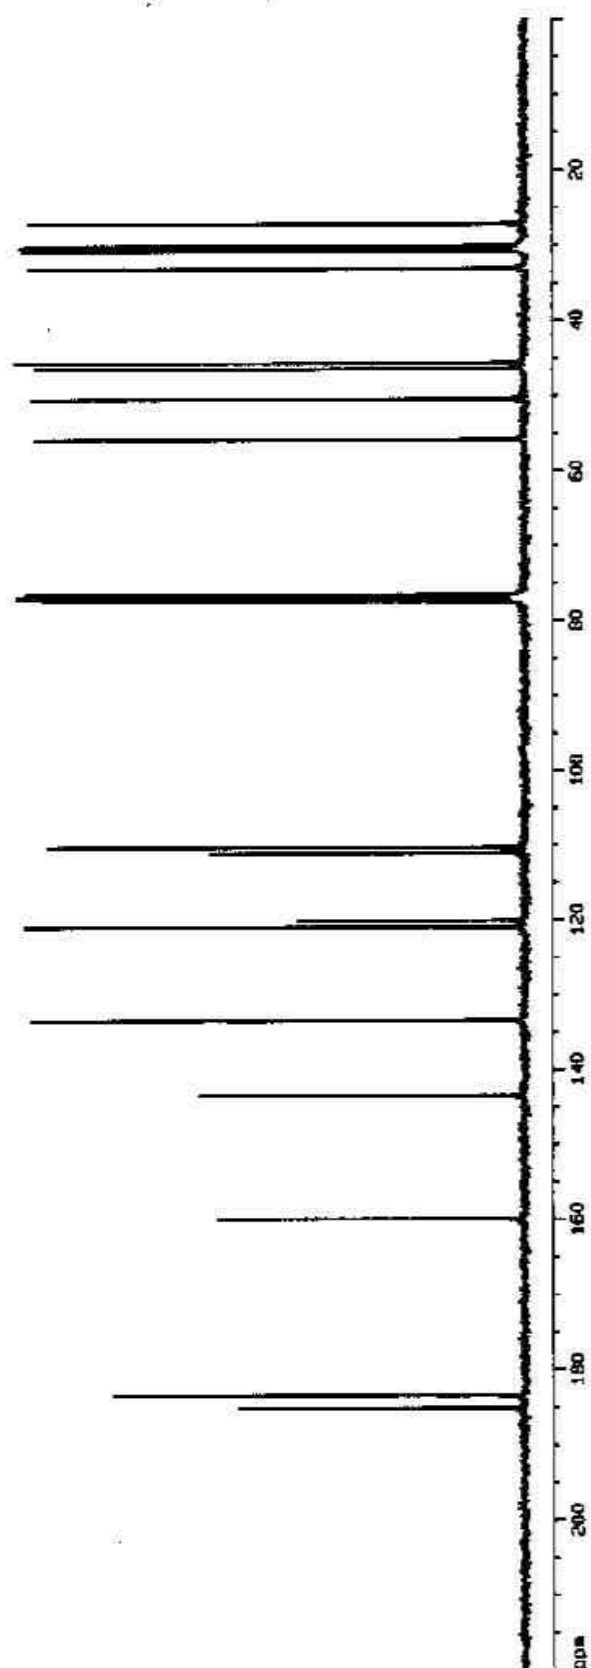

Compound 6a, 300 MHz  $^1\text{H}$  NMR ( $\text{CDCl}_3$ )

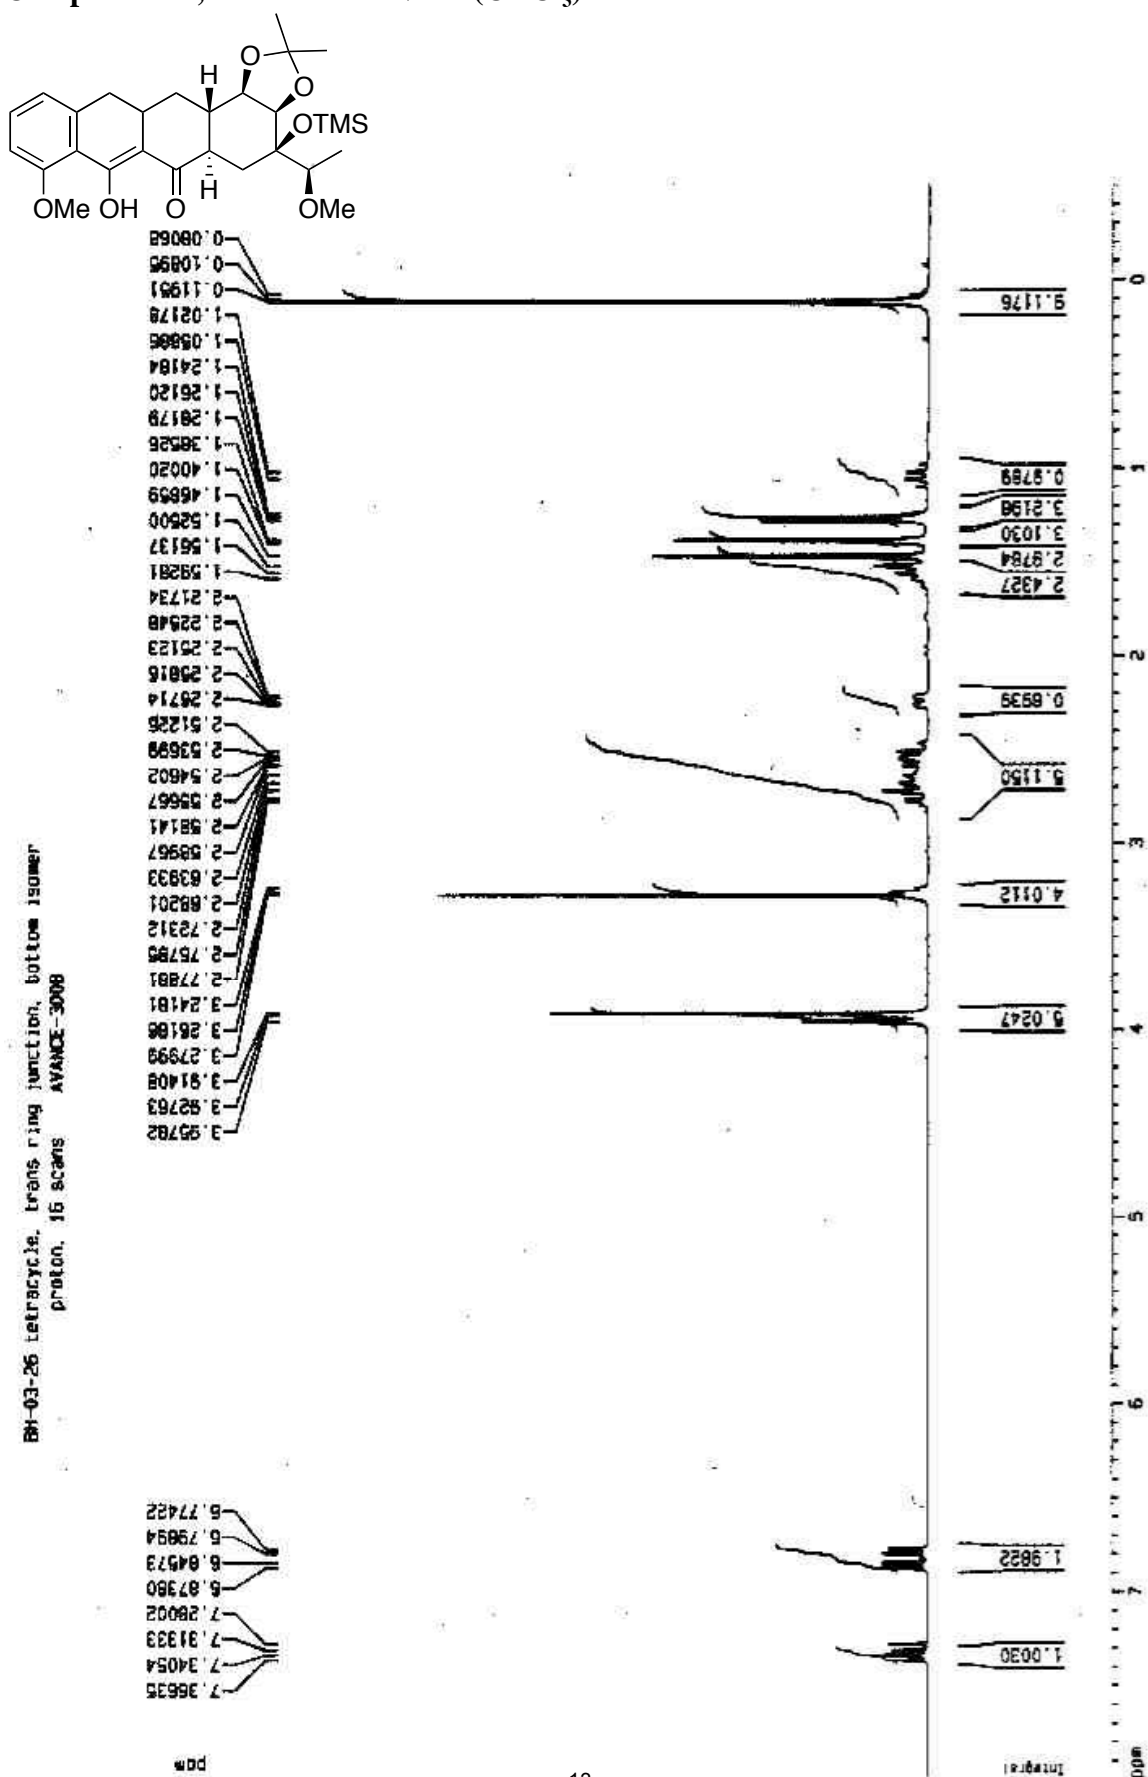

Compound 6a, 75 MHz  $^{13}\text{C}$  NMR ( $\text{CDCl}_3$ )

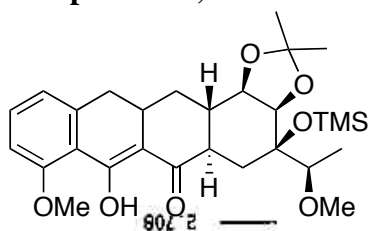

12.481

25.348

28.699

30.630

32.254

33.288

37.582

38.858

40.320

55.004

57.194

76.575

76.999

77.423

77.816

80.354

80.485

85.278

107.321

107.513

108.418

110.477

120.000

120.628

133.199

144.537

159.831

185.384

186.116

ppm

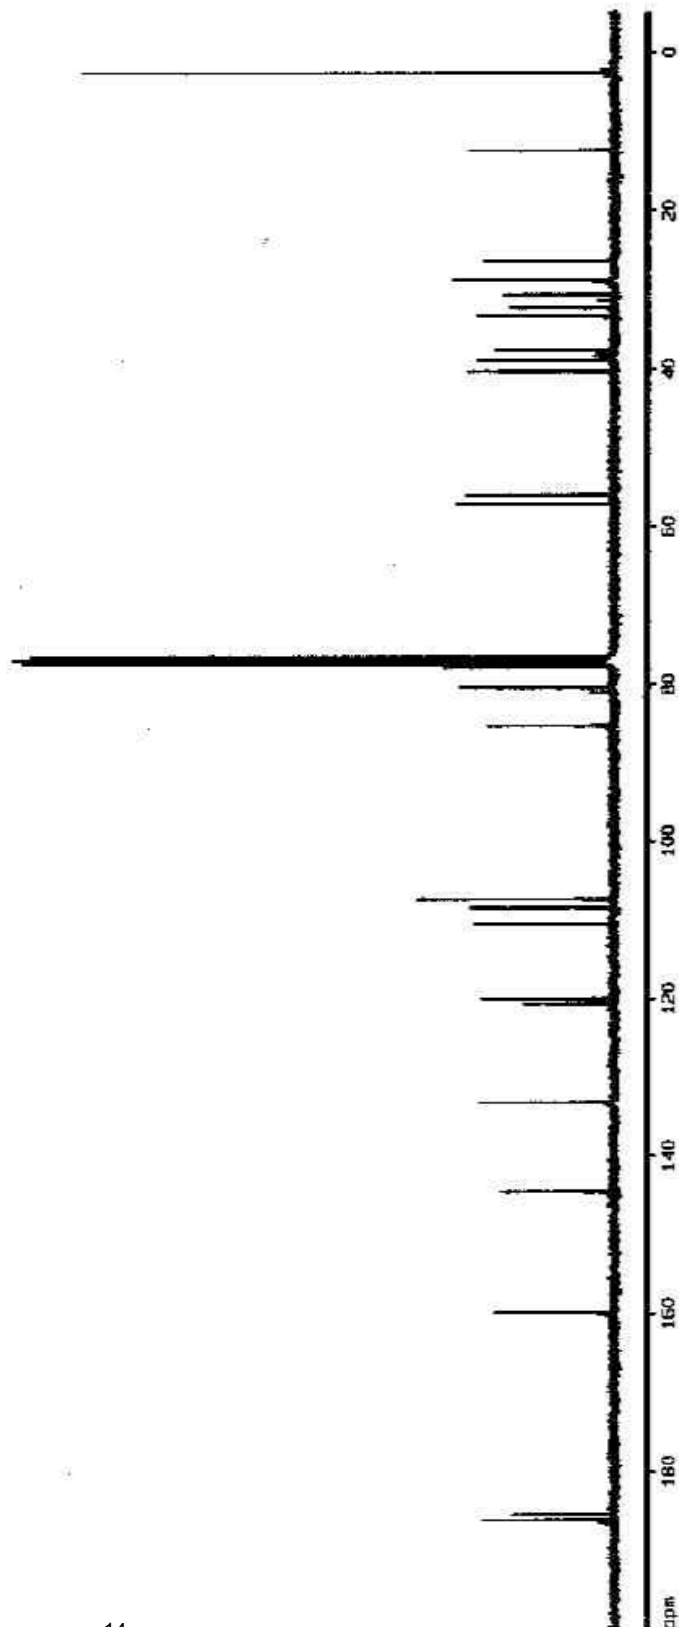

84-03-26 tetracycle, trans ring junction, bottom isomer  
C-13 with Decoupling AVANCE-300B

Compound 6b, 300 MHz  $^1\text{H}$  NMR ( $\text{CDCl}_3$ )

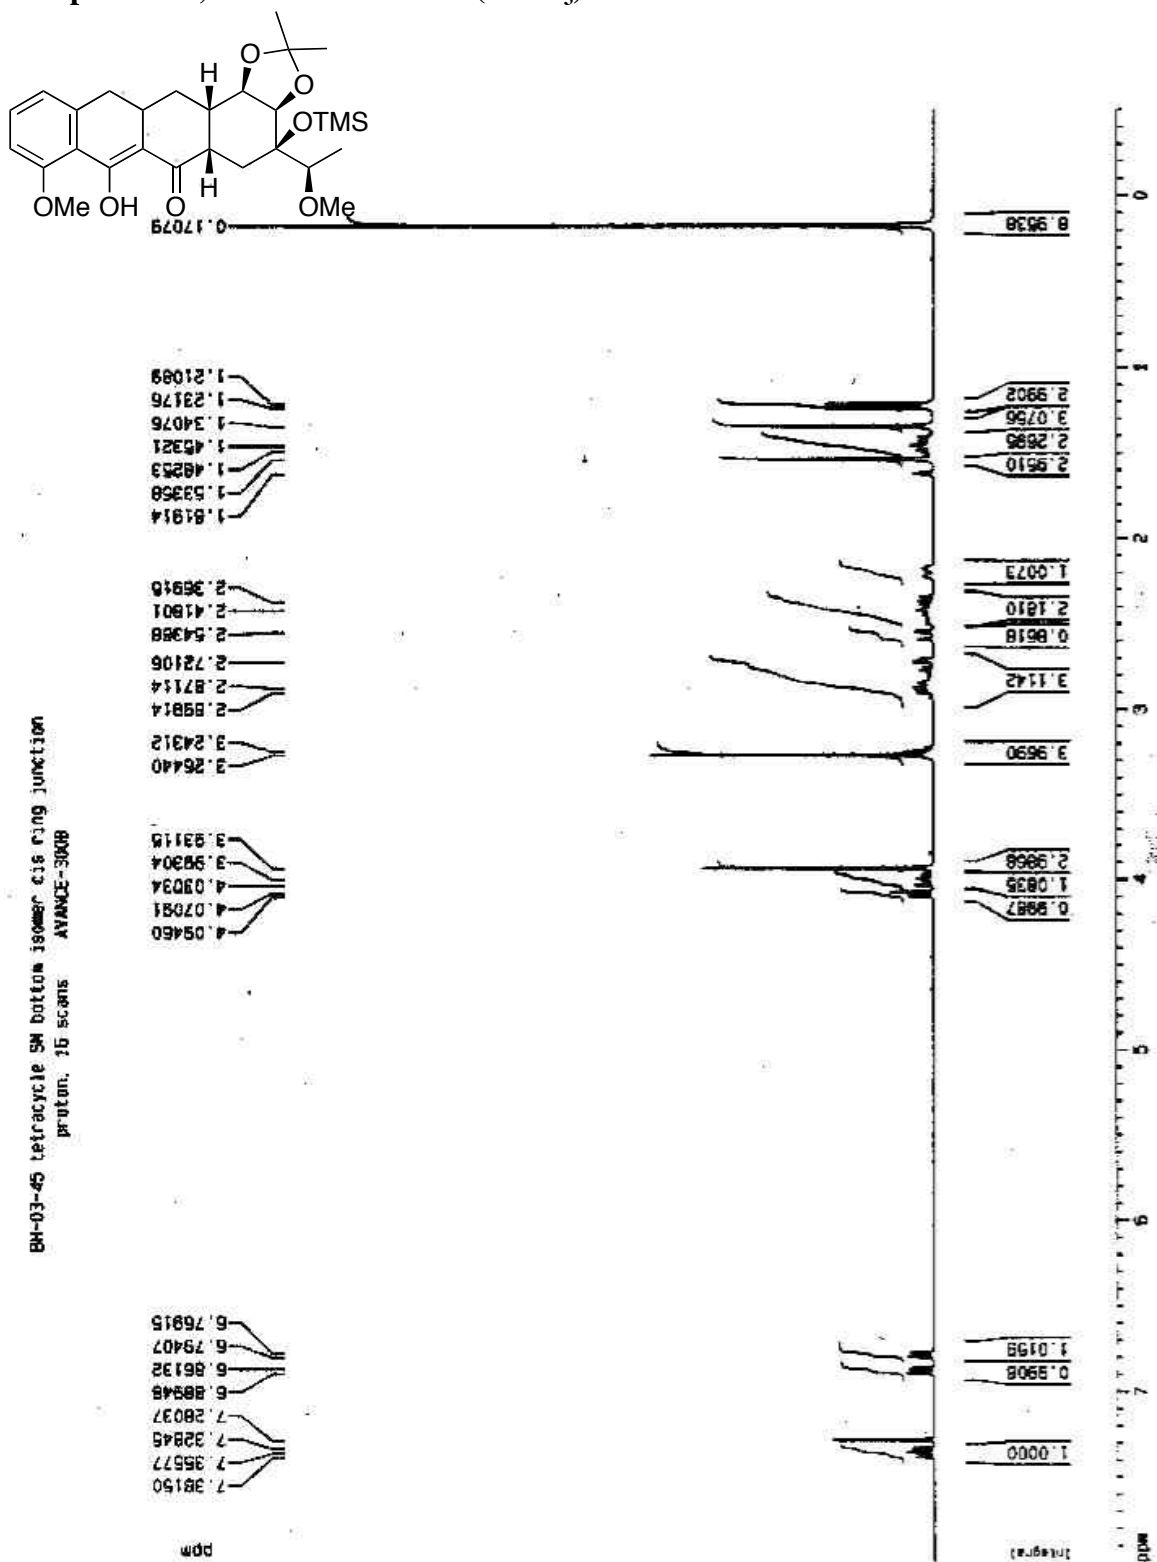

Compound 6b, 75 MHz  $^{13}\text{C}$  NMR ( $\text{CDCl}_3$ )

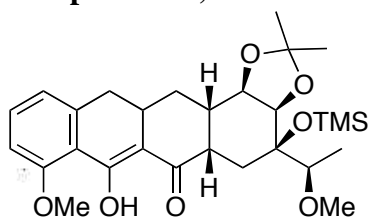

2.744

12.295

25.211

27.368

27.958

29.524

29.522

33.081

36.536

37.463

55.985

56.245

74.453

75.575

76.577

77.000

77.424

77.711

80.982

108.281

108.481

110.479

119.961

120.800

133.304

144.948

159.770

185.854

186.259

01-03-40 tetracyclic, cis ring junction, bottom isomer  
E-13 with Decoupling AVANCE-300B

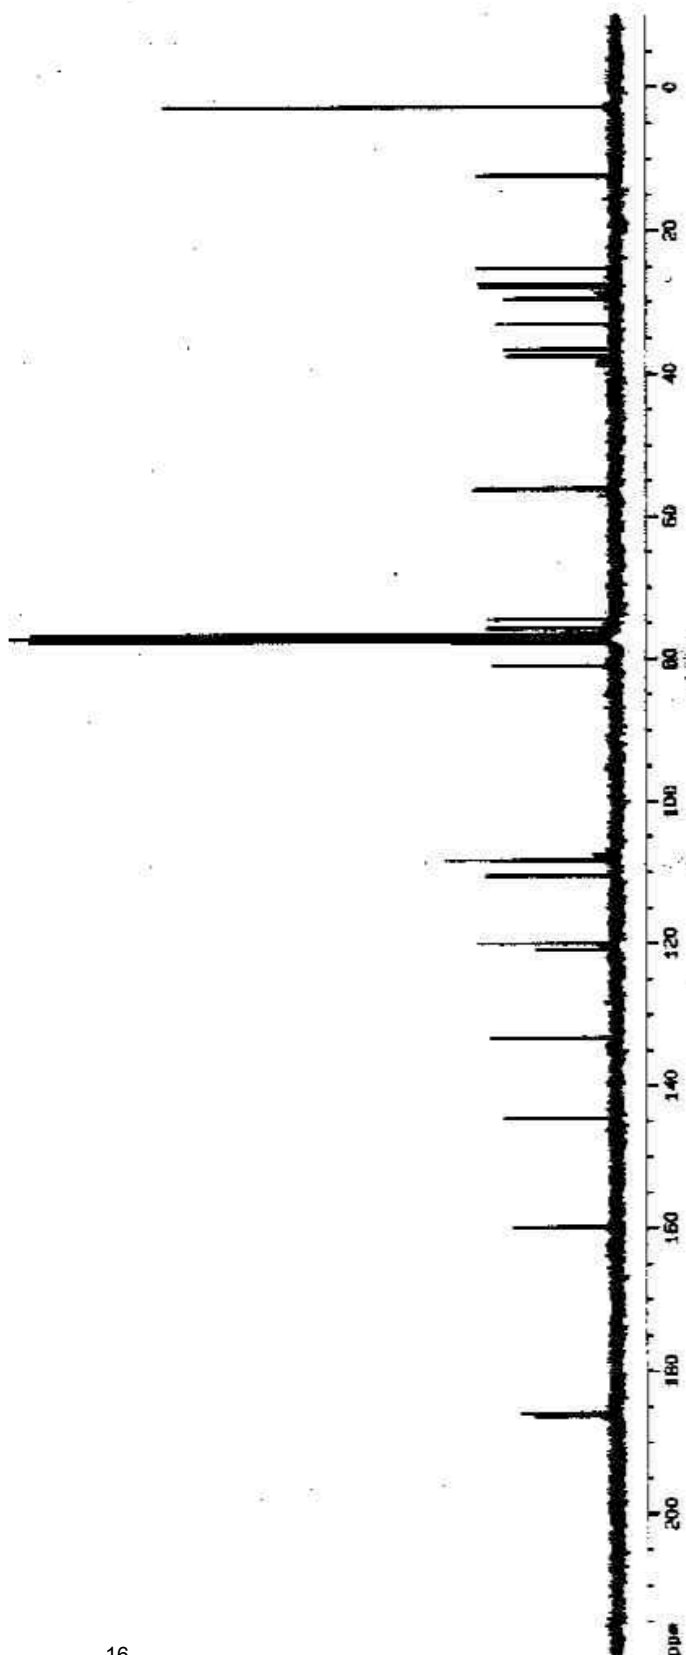

ppm



Compound 7, 300 MHz  $^1\text{H}$  NMR ( $\text{CDCl}_3$ )

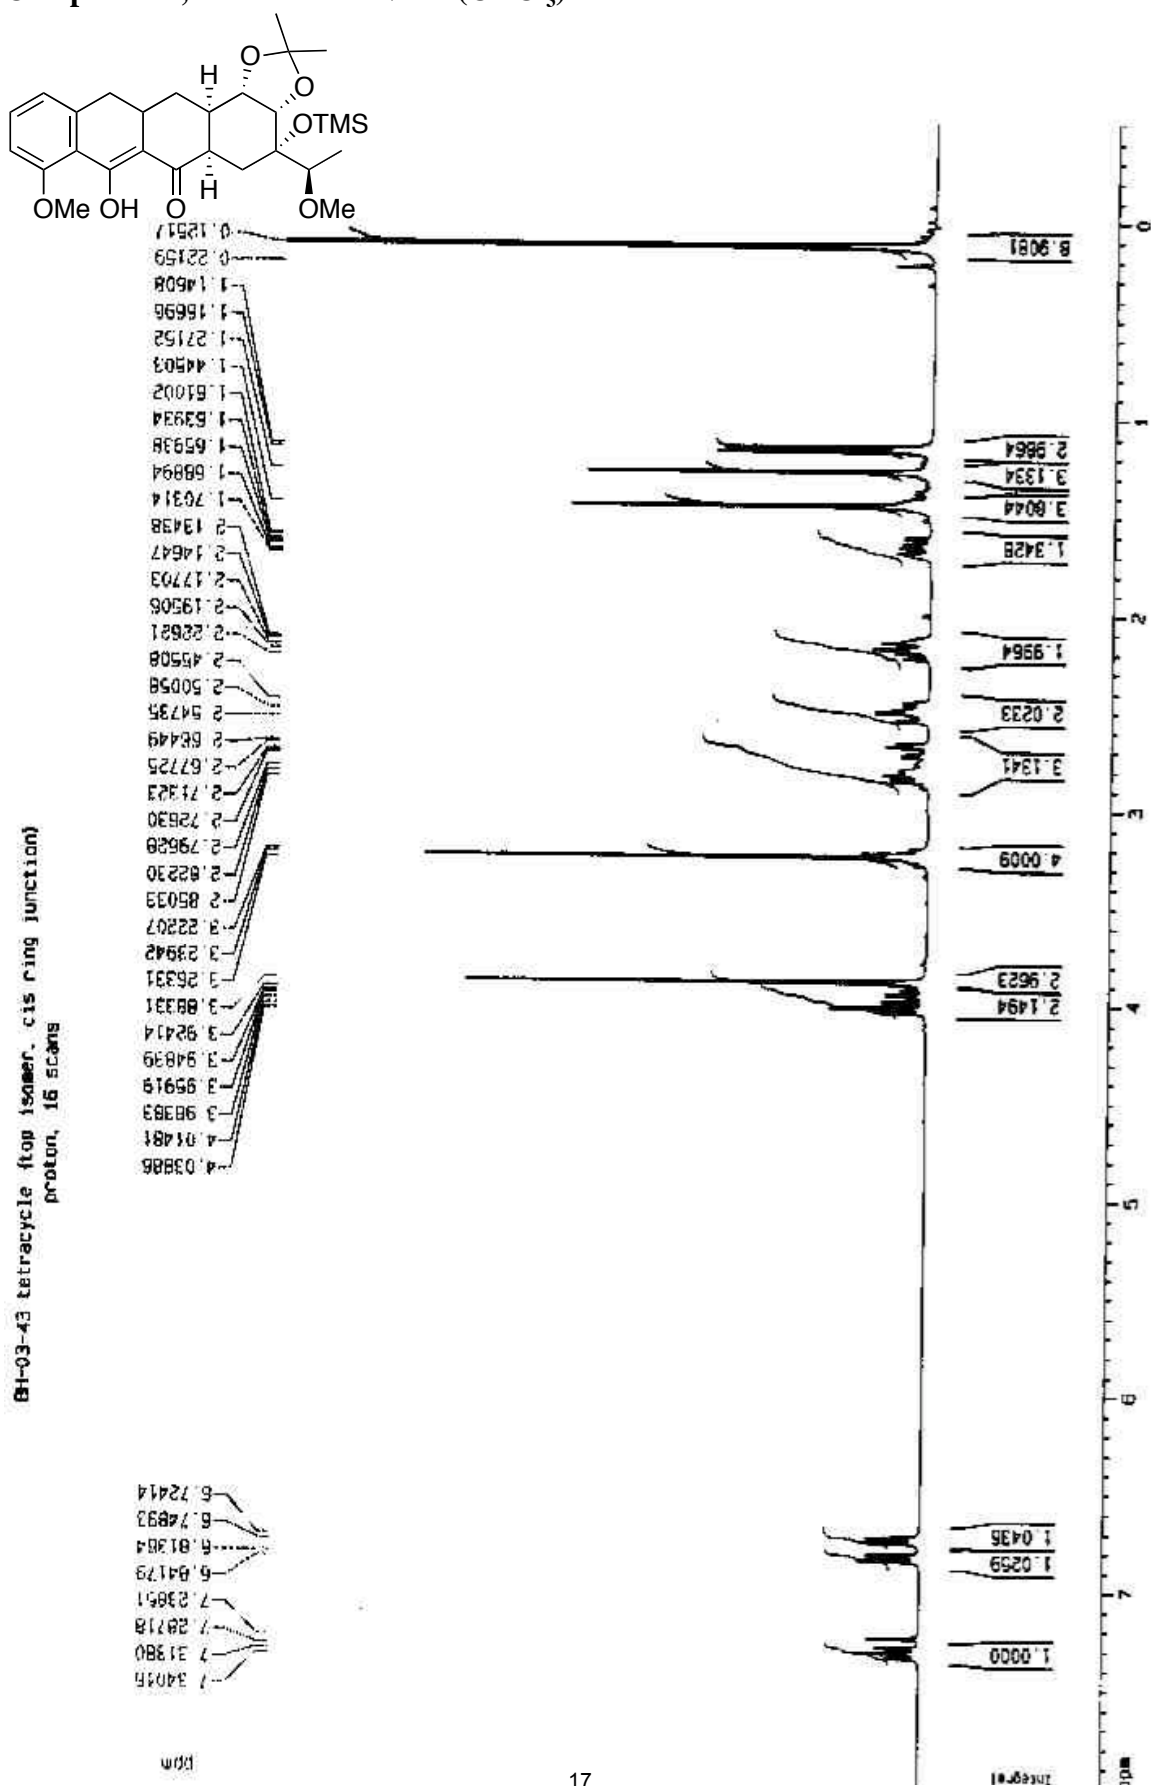

Compound 7, 75 MHz  $^{13}\text{C}$  NMR ( $\text{CDCl}_3$ )

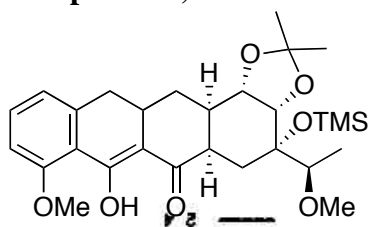

6H-03-43 tetracycle (top isomer, cis ring junction)  
 $^{13}\text{C}$  observe with  $^1\text{H}$  decoupling

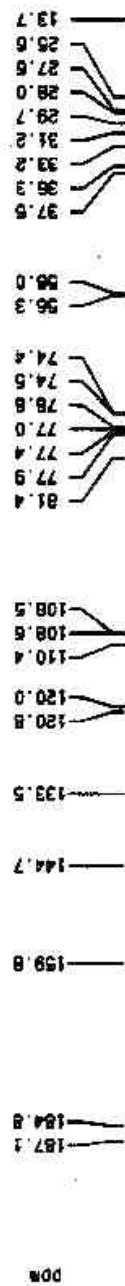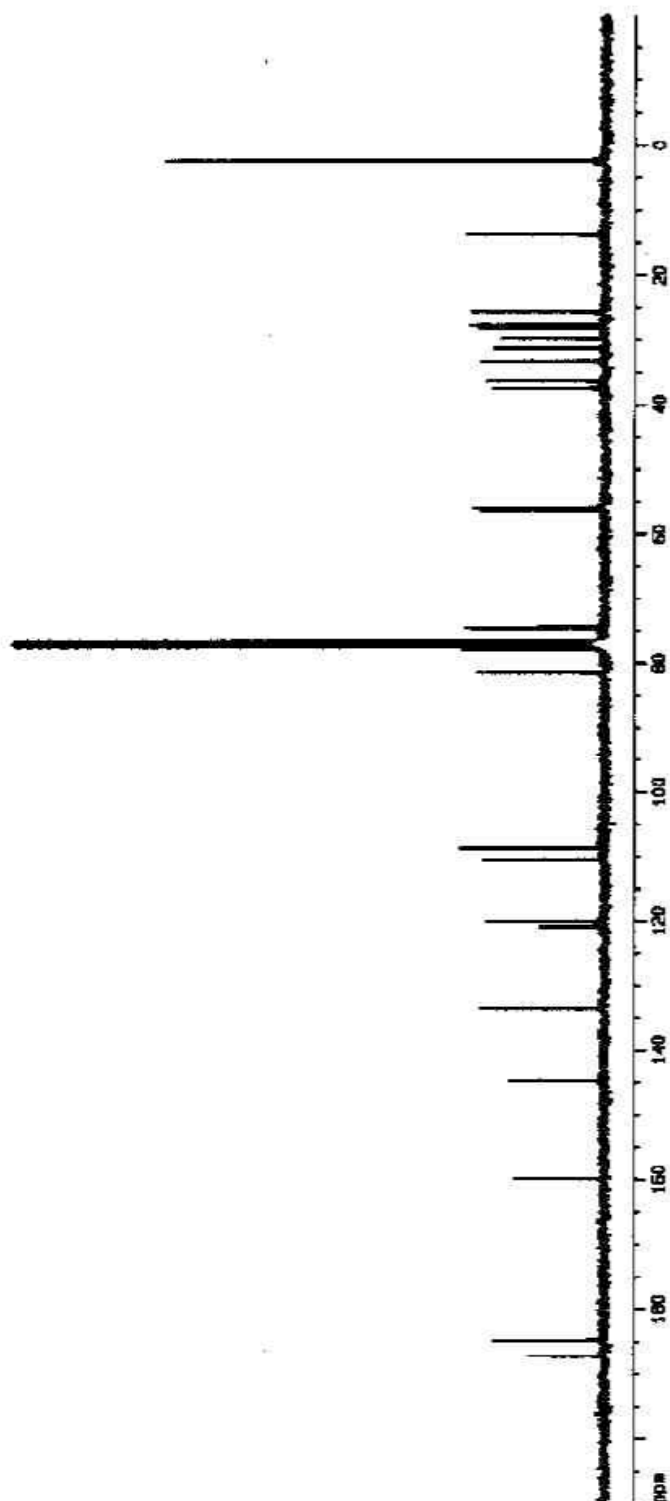

Compound 8, 300 MHz  $^1\text{H}$  NMR ( $\text{CDCl}_3$ )

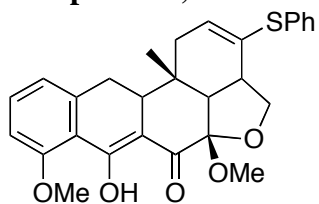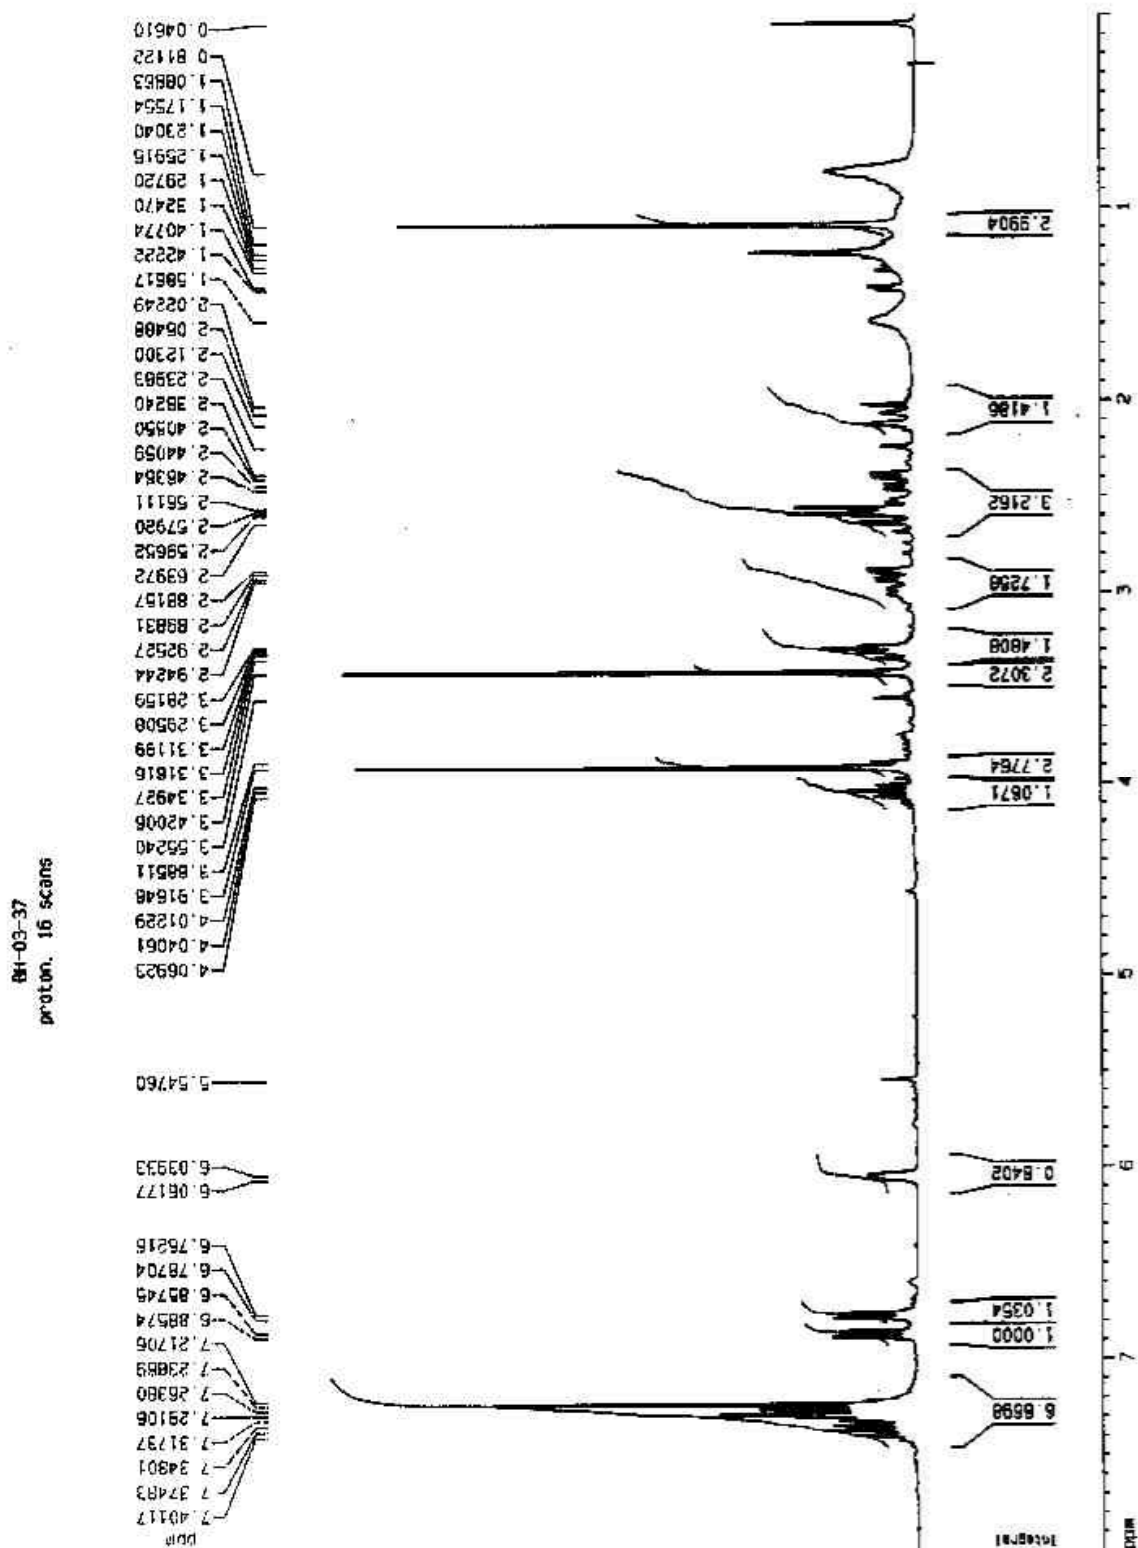

Supplement: Supplementary file 1 [file 5093569]
